# Supplementary material for: Atopic Dermatitis and Skin Cancer Risk: A Systematic Review
Source: Springer Nature journal article supplement (doi:10.1007/s13555-022-00720-2), 2022-04-17
Supplement: MOESM1 [file 20319288]

## **Atopic dermatitis and skin cancer risk: a systematic review**

Yun Zhu<sup>1,2</sup>; Hongmei Wang<sup>2</sup>; Juan He<sup>2</sup>; Luhui Yang<sup>2</sup>; Xiaoyan Zhou<sup>2</sup>; Zhe Li<sup>2</sup>; Huiling Zhou<sup>2</sup>; Huadi Zhao<sup>2</sup>; Yuye Li<sup>2\*</sup>

<sup>1</sup>Department of Dermatology, The Sixth Affiliated Hospital of Kunming Medical University, No. 21 Nieer Road, Yuxi, 653100, Yunnan, China

<sup>2</sup>Department of Dermatology, The First Affiliated Hospital of Kunming Medical University, 295 Xichang Road, Kunming, 650032, Yunnan, China

**Short Title:** Atopic dermatitis and skin cancer risk

**\*Corresponding author:** Yuye Li, Department of Dermatology, The First Affiliated Hospital of Kunming Medical University, 295 Xichang Road, Kunming, 650032, Yunnan, China. E-mail: yyeli2000@126.com

**Table S1.** Methodological Quality of Studies Included in the Final Analysis, Based on the Newcastle-Ottawa Scale

| Cohort studies(*)       | Selection                                |                                    |                           | Outcome of interest not present at start of study | Comparability                                                              | Outcome/Exposure       |                                                     |                                  | Total score |
|-------------------------|------------------------------------------|------------------------------------|---------------------------|---------------------------------------------------|----------------------------------------------------------------------------|------------------------|-----------------------------------------------------|----------------------------------|-------------|
|                         | Representativeness of the exposed cohort | Selection of the nonexposed cohort | Ascertainment of exposure |                                                   | Comparability of cohorts on the basis of the design or analysis            | Assessment of outcome  | Was Follow-up long enough for outcomes to occur     | Adequacy of follow-up of cohorts |             |
| Case-control studies(#) | Is the case definition adequate?         | Representativeness of the cases    | Selection of Controls     | Definition of Controls                            | Comparability of cases and controls on the basis of the design or analysis | Assessment of exposure | Same method of ascertainment for cases and controls | Non-Response rate                |             |
| Milán,2003(*)           | 1                                        | 1                                  | 1                         | 1                                                 | 2                                                                          | 1                      | 1                                                   | 0                                | 8           |
| Ming,2004(#)            | 1                                        | 1                                  | 1                         | 1                                                 | 1                                                                          | 1                      | 1                                                   | 0                                | 7           |
| Hagströmer,2005(*)      | 1                                        | 1                                  | 1                         | 1                                                 | 1                                                                          | 1                      | 1                                                   | 0                                | 7           |
| Olesen,2005(*)          | 1                                        | 1                                  | 1                         | 1                                                 | 1                                                                          | 1                      | 1                                                   | 0                                | 7           |
| Synnerstad,2008(*)      | 1                                        | 1                                  | 1                         | 1                                                 | 1                                                                          | 1                      | 1                                                   | 1                                | 8           |
| Arana,2010(*)           | 1                                        | 1                                  | 1                         | 1                                                 | 1                                                                          | 1                      | 1                                                   | 0                                | 7           |

|                       |   |   |   |   |   |   |   |   |   |
|-----------------------|---|---|---|---|---|---|---|---|---|
| El-Zein,2010(#)       | 1 | 0 | 0 | 1 | 2 | 1 | 1 | 0 | 6 |
| Janković,2010(#)      | 1 | 1 | 0 | 1 | 2 | 1 | 1 | 0 | 7 |
| Dyer,2012(*)          | 1 | 1 | 0 | 1 | 2 | 1 | 1 | 1 | 8 |
| Jensen,2012(*)        | 1 | 1 | 1 | 1 | 2 | 1 | 1 | 0 | 8 |
| Roncarolo,2012(#)     | 1 | 1 | 0 | 1 | 2 | 1 | 1 | 1 | 8 |
| Hajdarbegovic,2014(#) | 1 | 1 | 0 | 1 | 1 | 1 | 1 | 1 | 7 |
| Cheng,2015(#)         | 1 | 1 | 0 | 1 | 2 | 1 | 1 | 1 | 8 |
| Marasigan,2017(#)     | 1 | 1 | 1 | 1 | 2 | 1 | 1 | 0 | 8 |
| Cho,2018(#)           | 1 | 1 | 1 | 1 | 2 | 1 | 1 | 0 | 9 |
| D'Arcy,2019(*)        | 1 | 1 | 0 | 1 | 2 | 1 | 1 | 0 | 7 |
| Mansfield,2020(#)     | 1 | 1 | 1 | 1 | 2 | 1 | 1 | 1 | 9 |

---

\*: Cohort studies; #: Case-control studies
